# Supplementary material for: Ultrasmall PEGylated MnxFe3−xO4 (x = 0–0.34) nanoparticles: effects of Mn(ii) doping on T1- and T2-weighted magnetic resonance imaging
Source: Royal Society of Chemistry journal article supplement (doi:10.1039/c3ra43985b), 2013-01-01
Supplement: c3ra43985b.pdf [file c3ra43985b.pdf]

## Supporting Information

### Ultrasmall PEGylated $\text{Mn}_x\text{Fe}_{3-x}\text{O}_4$ ( $x=0-0.34$ ) Nanoparticles: Effects of Mn(II) Doping on $T_1$ - and $T_2$ -Weighted Magnetic Resonance

#### Imaging

Lijing Wang,<sup>a</sup> Qiong Wu,<sup>a</sup> Su Tang,<sup>a</sup> Jianfeng Zeng,<sup>b</sup> Ruirui Qiao,<sup>b</sup> Pan Zhao,<sup>a</sup> Yuan Zhang,<sup>a</sup> Fengqin Hu\*<sup>a</sup> and Mingyuan Gao<sup>b</sup>

<sup>a</sup> College of Chemistry, Beijing Normal University, Beijing 100875, People's Republic of China. E-mail: fqhu@bnu.edu.cn

<sup>b</sup> Institute of Chemistry, CAS, Bei Yi Jie 2, Beijing 100190, People's Republic of China.

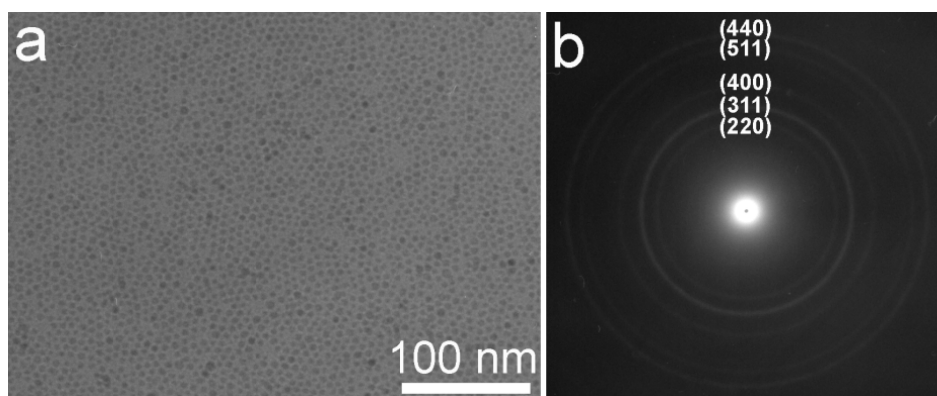

**Fig. S1** (a) TEM image and (b) electron diffraction patterns of the  $\text{Mn}_{0.30}\text{Fe}_{2.70}\text{O}_4$  NPs synthesized through hot injection method.

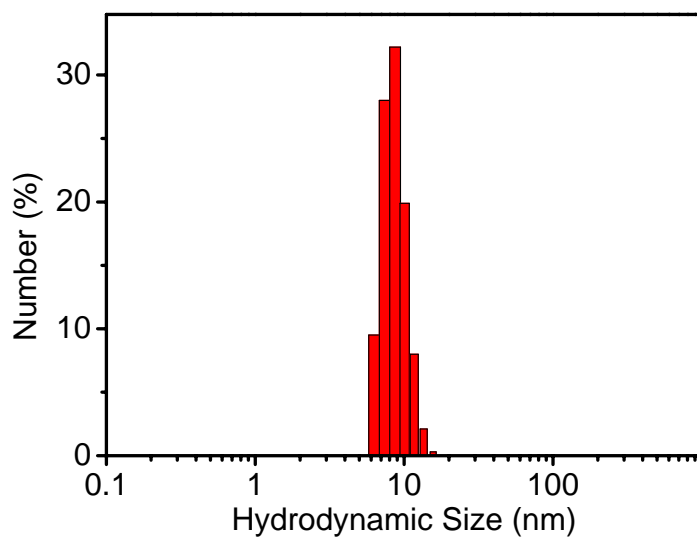

**Fig. S2** Hydrodynamic size distribution of the Mn<sub>0.34</sub>Fe<sub>2.66</sub>O<sub>4</sub> NPs freshly dispersed in PBS.

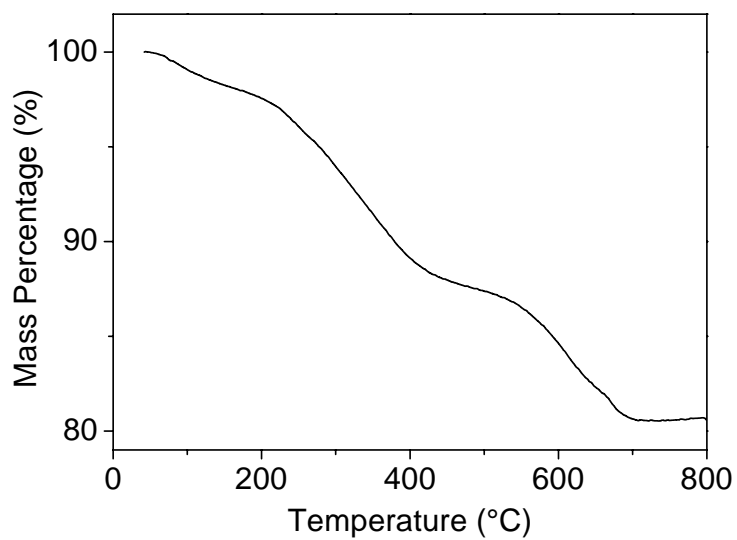

**Fig. S3** TGA of the Mn<sub>0.34</sub>Fe<sub>2.66</sub>O<sub>4</sub> NPs.
